1     **Heterogeneity in clone dynamics within and adjacent to intestinal tumours**  
2                     **identified by Dre-mediated lineage tracing**

3

4     Ann-Sofie Thorsen<sup>1</sup>, Doran Khamis<sup>2</sup>, Richard Kemp<sup>1</sup>, Mathilde Colombé<sup>1</sup>, Filipe C.  
5                     Lourenço<sup>1</sup>, Edward Morrissey<sup>2</sup> and Douglas Winton<sup>1</sup>

6

7     <sup>1</sup>Cancer Research-UK Cambridge Institute, Li Ka Shing Centre, Robinson Way,  
8     Cambridge, CB2 0RE, UK.

9

10    <sup>2</sup> University of Oxford, Center for computational biology, Weatherall Institute of  
11    Molecular Medicine, University of Oxford, John Radcliffe Hospital, Oxford OX3 9DS,  
12    UK

13

14    **Correspondence to:**

15    Dr. Douglas J. Winton

16    Email: [doug.winton@cruk.cam.ac.uk](mailto:doug.winton@cruk.cam.ac.uk)

17    Ph: +44 (0) 1223 769783

18

19    **Keywords:** Lineage tracing; Cancer; Intestine, Epithelial

20

21 **Abstract**

22 Somatic models of tissue pathology commonly utilise induction of gene specific  
23 mutations in mice mediated by spatiotemporal regulation of Cre recombinase.  
24 Subsequent investigation of the onset and development of disease can be limited by  
25 the inability to track changing cellular behaviours over time. Here a lineage tracing  
26 approach based on ligand dependent activation of Dre recombinase that can be  
27 employed independently of Cre is described. The clonal biology of intestinal epithelium  
28 following Cre-mediated stabilisation of  $\beta$ -catenin reveals that within tumours many new  
29 clones rapidly become extinct. Surviving clones show accelerated population of  
30 tumour glands compared to normal intestinal crypts but in a non-uniform manner  
31 indicating that intra-tumour glands follow heterogeneous dynamics. In tumour adjacent  
32 epithelium clone sizes are smaller than in the background epithelium as a whole. This  
33 suggests a zone of around 5 crypt diameters within which clone expansion is inhibited  
34 by tumours and that may facilitate their growth.

35

36

## 37 **Introduction**

38 Mouse models of pathology in which phenotypes are somatically induced by the  
39 directed expression of recombinases have become a ubiquitous tool across all  
40 branches of the medical sciences. Currently there are over 4000 mouse lines  
41 engineered for this purpose (EUCOMM, 2019; Jax.org, 2019). Activation of  
42 recombination in adult tissues is highly efficient and can result in altered cellular  
43 behaviours that can change over time due to adaptation, cellular exhaustion or  
44 progression and consequently display different phenotypes that may reflect different  
45 disease settings. Examples include arteriosclerosis (Ishibashi et al., 1993), diabetes  
46 (Zhang et al., 1994), inflammation (Stremmel et al., 2017), Alzheimer's (Matsuda et  
47 al., 2008), Parkinson's disease (Choi et al., 2017) and cancer (Cheung et al., 2009).

48

49 An important aspect of the phenotypic characterisation of affected tissues following  
50 recombination often includes lineage tracing in which the origins and fate of individual  
51 cells and their descendants are followed over time using acquired expression of a cell  
52 autonomous reporter gene. Problematic in such lineage tracing experiments is that  
53 reporter expression is often dependent on the activity of the same recombinases  
54 acting to induce the phenotype of interest. This is a major limitation as the level and  
55 timing of recombination required for lineage tracing may be very different from that  
56 needed to induce the phenotype although re-switchable cassettes can sometimes be  
57 employed (Schepers et al., 2012).

58

59 The most widely used DNA recombinases in *in vivo* mouse models are Cre and Flp  
60 (Sadowski, 1995; Sternberg and Hamilton, 1981). Historically, most cancer associated  
61 conditional alleles contain pairs of loxP sites for Cre driven recombination: e.g.

62 *Tp53*<sup>flox2-10</sup> (Marino et al., 2000), *Apc*<sup>flox</sup> (Cheung et al., 2009) and *Ctnnb1*<sup>flox(ex3)</sup>  
63 (Harada et al., 1999). Some frt alleles for Flp driven recombination are also available:  
64 e.g. *Kras*<sup>fsfG12D</sup> (Young et al., 2011). To employ recombinases sequentially requires  
65 independent spatiotemporal control of the activity of different DNA-recombinases that  
66 can only occur if they are expressed under different promoters and/or activated by  
67 different ligands.

68

69 The novel Dre DNA recombinase, discovered in a screen for Cre-like enzymes (Sauer  
70 and McDermott, 2004), recognises 32 bp rox sites. The Dre/rox system does not  
71 cross-react with the Cre/loxP system (Anastassiadis et al., 2009). Dre has been used  
72 in conjunction with Cre and Flp to identify cell populations defined by differential  
73 promoter activity (Hermann et al., 2014; Madisen et al., 2015; Plummer et al., 2015;  
74 Sajgo et al., 2014). An inducible and functional Dre<sup>Pr</sup> fusion protein (Dre fused to the  
75 human progesterone receptor and activatable by the synthetic analogue Ru486) has  
76 been described (Anastassiadis et al., 2009) but has been used *in vivo* only in a single  
77 Zebrafish study (Park and Leach, 2013). Here we employ Dre<sup>Pr</sup> for somatic studies in  
78 adult mice and demonstrate that it can be used in combination with tamoxifen inducible  
79 Cre<sup>Ert</sup> alleles to initiate lineage tracing at any time following the activation of a Cre-  
80 mediated phenotype. The method is applied to determine the altered fate and clone  
81 dynamics of stem cell populations within and adjacent to intestinal tumours induced  
82 by stabilisation of  $\beta$ -catenin.

83

84

85

86

## 87 **Results**

### 88 **RDre<sup>Pr</sup> mice have widespread Dre expression**

89 The RDre and RDre<sup>Pr</sup> animals were created by homologous recombination of targeting  
90 vectors into the *R26* locus in mouse embryonic stem cells as described before (Vooijs,  
91 et al., 2001) (Figure S1A). A rox-STOP-rox (rsr) tdTomato (tdTom) reporter line  
92 (*R26<sup>rsrtdTom</sup>*) was generated by germline deletion of the loxP-STOP-loxP (Isl) cassette  
93 from the *R26<sup>rsrIslTdTom</sup>* allele (The Jackson Laboratory stock no. 021876). To investigate  
94 Dre activity in different tissues, RDre and RDre<sup>Pr</sup> animals were crossed to these  
95 *R26<sup>rsrtdTom</sup>* reporter mice to generate compound *RDre;R26<sup>rsrtdTom</sup>* and  
96 *RDre<sup>Pr</sup>;R26<sup>rsrtdTom</sup>* here referred to as RDre;RtdTom<sup>rsr</sup> and RDre<sup>Pr</sup>;RtdTom<sup>rsr</sup>,  
97 respectively.

98 First, adult RDre;RtdTom<sup>rsr</sup> mice were analysed and the widespread activity of Dre  
99 across many tissues was confirmed by IHC for tdTom expression (Figures S1B and  
100 S2). However, cells in the outer most layer of the epidermis and bone cartilage did not  
101 express any tdTom at time of analysis (Figures S1B and S2). Next, to investigate Dre<sup>Pr</sup>  
102 activity after Ru486 exposure, RDre<sup>Pr</sup>;RtdTom<sup>rsr</sup> animals had 1, 2 or 3, 90-day slow  
103 release pellets containing 10mg/pellet Ru486 implanted sub-cutaneously. At 75 days  
104 post implantation animals were sacrificed, and tissues from different germ-layers were  
105 collected for tdTom expression analysis. Importantly, the Dre<sup>Pr</sup> fusion mice showed a  
106 complete absence of tdTom expression in all tissues in uninduced mice (Figures S1B  
107 and S2). In contrast, following induction with Ru486 sporadic tdTom expression was  
108 observed in many tissues. Epithelial cells and/or clones expressing tdTom were  
109 observed in: endoderm derived intestine, stomach, liver, pancreas; mesoderm derived  
110 spleen and kidney and ectoderm derived skin (Figure S1B). Furthermore, quantitative  
111 flow cytometry confirmed that intestinal epithelial cells were activated by Ru486 pellets

112 in a dose responsive manner (Figure S3A-C). Of note, not all tissue types analysed  
113 expressed tdTom after Ru486 exposure including lung, heart, bone and tongue (Figure  
114 S2). The observation that these tissues did show widespread recombination in  
115 RDre;RtdTom<sup>rsr</sup> mice suggests transcriptional silencing at the *ROSA* locus in these  
116 tissues in adult mice or that Ru486 does not reach all tissues, as described before for  
117 Cre recombinase and Tamoxifen (Sinha and Lowell, 2017; Vooijs et al., 2001). These  
118 results show that Dre<sup>Pr</sup> has no background activity and is activated by Ru486 in various  
119 tissues, including the intestinal epithelium.

120

### 121 **Dre<sup>Pr</sup> can be clonally induced in epithelial cells**

122 Next, the ability of Dre<sup>Pr</sup> to operate as a lineage tracing tool in epithelial tissues was  
123 investigated. Lineage tracing is commonly carried out by pulse chase experiments  
124 (Ghosh et al., 2011; Giroux et al., 2017; Van Keymeulen et al., 2011; Papafotiou et al.,  
125 2016; Snippert et al., 2010; Vermeulen et al., 2013). To investigate the activity of Dre<sup>Pr</sup>  
126 after a pulse of inducer, Ru486 was administered to RDre<sup>Pr</sup>;RtdTom<sup>rsr</sup> mice by intra  
127 peritoneal (i.p.) injection at doses of 50 or 80 mg/kg (single injections) or 240 mg/kg  
128 (80mg/kg administered on three consecutive days). After 14 days animals were culled  
129 and the bladder, trachea, oesophagus and caecum were analysed by fluorescent  
130 microscopy (Figure 1A-D). This revealed that tdTom positive clones could be observed  
131 in all tissues (Figure 1A-D). Additionally, clones were also observed in the intestine  
132 (Figure 1E-G) and the number of clones observed in the small intestine and colon 14  
133 days post induction increased in a dose responsive fashion in both (Figure 1H,I). The  
134 number of clones/cm in the small intestine was ~100 vs ~300 following a single or  
135 three dose(s) of 80 mg/kg Ru486, respectively, and indicated a near linear  
136 accumulation of signal (Figure 1H,I). Twenty-four hours after Ru486 administration,

137 single tdTom<sup>+</sup> cells could be observed in the bottom of intestinal crypts (Figure 1J).  
138 Over time, tdTom could be observed in whole crypts and villi after Dre<sup>Pr</sup> induction both  
139 in the small intestine and colon (Figure 1K-O). Such, fully clonal crypt-villus clones  
140 expressed both goblet, Paneth, Tuft and enteroendocrine cells (Figure 1K-O),  
141 underlining that Dre<sup>Pr</sup> was activated in single clonal intestinal stem cells, and that these  
142 cells can give rise to differentiated daughter cells.

143 For clonal lineage tracing experiments to be informative the frequency of clone  
144 induction has to be low enough to avoid clonal collisions over the time course of the  
145 experiment but high enough to permit quantitation within a defined region of the tissue.  
146 Here we find that 50 mg/kg Ru486 was the optimal pulsing dose in lineage trace  
147 experiments as this dose appeared to hit <1 stem cell per crypt at early time points  
148 (Figure 1J) and induced an appropriate sparsity of clones at later timepoints (Figure  
149 1E, H,I).

150

### 151 **Lineage tracing and quantitative inference of intestinal stem cell dynamics** 152 **using Dre<sup>Pr</sup>**

153 The efficacy of Dre<sup>Pr</sup> for lineage tracing was investigated in mouse intestine by  
154 performing a direct quantitative comparison of epithelial clone size distributions to  
155 those obtained in a previously employed Cre-based model (Kemp, 2004; Vermeulen  
156 et al., 2013). Clones were induced in AhCre<sup>Ert</sup>;RtdTom<sup>Isl</sup> mice by a single induction  
157 dose (40 mg/kg  $\beta$ -naphthoflavone and 0.15 mg Tamoxifen) and RDre<sup>Pr</sup>;RtdTom<sup>r<sup>sr</sup></sup> mice  
158 received a single dose of 50 mg/kg Ru486. Small intestine and colon from both strains  
159 were analysed at 4, 7, 10, 14 and 21 days post induction and fluorescence microscopy  
160 of whole mounted tissues was employed to score the relative sizes of tdTom<sup>+</sup> clones  
161 in intestinal crypts (Figure 2 A,B). The average clone sizes and changes in the clone

162 size distribution with time in the small intestine and colon were found to be remarkably  
163 similar in the two models (Figure 2C-H).

164 Changes in clone size distributions with time arise from a neutral drift pattern of  
165 stem cell renewal that is characterised in each crypt as a 1D random walk on a ring of  
166  $N$  stem cells each with a daily replacement rate  $\lambda$  (Kozar et al., 2013; Lopez-Garcia et  
167 al., 2010). For RDre<sup>Pr</sup>;RtdTom<sup>rsr</sup> and AhCre<sup>Ert</sup>;RtdTom<sup>Isl</sup> animals (Figure 2I-N) the  
168 model predicted average clone sizes over 100 days based on the lineage tracing data  
169 (Figure 2I-J). The analysis inferred  $N$  to be 6 and 7 in the small intestine and colon,  
170 respectively, in both the RDre<sup>Pr</sup>;RtdTom<sup>rsr</sup> and AhCre<sup>Ert</sup>;RtdTom<sup>Isl</sup> models (Figure 2K-  
171 L). Furthermore,  $\lambda$  was estimated to be 0.15 vs 0.15 in the small intestine and to 0.19  
172 vs 0.20 in the colon of RDre<sup>Pr</sup>;RtdTom<sup>rsr</sup> and AhCre<sup>Ert</sup>;RtdTom<sup>Isl</sup> animals, respectively  
173 (Figure 2K-L). Importantly the average clone sizes presented here and the inferred  
174 values for  $N$  and  $\lambda$  were similar to those previously reported using alternative Cre  
175 recombination models or orthogonal approaches (Kozar et al., 2013; Vermeulen et al.,  
176 2013). Taken together, these observations show that the epithelial behaviours of  
177 intestinal stem cells are not perturbed by either Dre<sup>Pr</sup> expression or the treatment with  
178 Ru486 indicating that Dre<sup>Pr</sup> traced stem cells have a non-biased neutral behaviour.

179

## 180 **Dre<sup>Pr</sup> can trace single cell derived clones in intestinal tumours**

181 Performing lineage tracing within overt or developing Cre-mediated pathologies  
182 requires a Cre-independent mechanism for reporter activation. To test the ability of  
183 Dre<sup>Pr</sup> to act in this way a Cre-induced intestinal tumour model based on stabilisation  
184 of  $\beta$ -catenin was employed. In *Ctnnb1*<sup>flox(ex3)</sup> mice removal of floxed exon3 is sufficient  
185 to induce development of intestinal tumours (Harada et al., 1999). Here, AhCre<sup>Ert</sup> was



186 utilized to induce *Ctnnb1* recombination and tumour initiation and Dre<sup>Pr</sup> was utilized to  
187 trace clones derived from single cells within nascent and established tumours.

188 To determine the number of traceable cells per tumour *Ctnnb1* was first  
189 recombined in the intestinal epithelium of AhCre<sup>Ert</sup>; *Ctnnb1*<sup>lox(ex3)</sup>; RDre<sup>Pr</sup>; RtdTom<sup>rsr</sup>  
190 animals by activating AhCre<sup>Ert</sup> with  $\beta$ -naphthoflavone and Tamoxifen. Importantly,  
191 these drugs did not induce tdTom expression (Figure 3A-B and Figure S4). At 21 days  
192 post *Ctnnb1* recombination lineage tracing in tumours was initiated by RDre<sup>Pr</sup> induction  
193 and mice were then aged until maximum tumour burden, 13 days (N=2), 17 days (N=1)  
194 and 19 days (N=1) days post Ru486 induction (Figure 3C). This protocol produced  
195 intestinal tumours expressing stabilised  $\beta$ -catenin that contained tdTom<sup>+</sup> clones  
196 (Figure 3D-G).

197 Each whole-mounted tumour was subjected to tissue clearing and fluorescence  
198 microscopy to score the number of clones per tumour (Figure 3H-J). Out of 184  
199 tumours analysed, 84 did not contain clones (45%). Dividing the data into early (day  
200 13 post Ru486 (N=2)) and late (day 17 and 19 post Ru486 (N=2)), demonstrated that  
201 at the earlier time tumours contained more clones than later ones; 20% and 60% of  
202 tumours containing no clones respectively (Figure 3I). Moreover, there appeared to be  
203 a trend that early tumours with clones contained more clones than late tumours (Figure  
204 3I). The average number of clones per tumour (of all tumours with clones, N=100) was  
205 found to be 4.4 and the highest number of clones in one tumour was 28 (Figure 3J).  
206 Tumour size appeared to correlate with number of clones, so that larger tumours  
207 contained a higher number of clones than smaller tumours (Figure 3K). Together these  
208 results suggest that tumour size dictates the number of clones per tumour that can be  
209 induced by Dre<sup>Pr</sup> and that as predicted by a neutral competition model of stem cell

210 replacement there are clonal extinction events occurring within developing tumours  
211 with time.

212

213 Next we sought to exploit the different times that mice were culled post lineage  
214 induction to derive the neutral behaviours of clones in tumour glands and to compare  
215 these to that of normal epithelium and of the background tumour-prone epithelium.

216 Clone sizes were quantified by classifying each clone by the proportion of the gland it  
217 occupied (as a fraction of 8) within and outside tumours and their spatial distribution  
218 determined with respect to the tumour centre (Tc) (Figure 4A) (see Methods). Analysis

219 within all tumours showed no clear relationship between clone size and tumour size  
220 (Figure 4B). However, although changes in tumour clone size distributions between

221 13 and 19 days were roughly parallel to that predicted for wildtype tissue and the  
222 background tissue in the same animals there was a massive over representation of  
223 monoclonal glands within tumours that did not fit with the trajectory of these later time

224 points (Figure 4C). Specifically, at 13, 17 and 19 days post-induction, 25.3% (69 of  
225 273), 28.4% (23 of 81) and 37.2% (32 of 86) of surviving clones inside tumours had  
226 monoclonally converted while outside tumours 3.1% (4 of 130), 7.0% (5 of 71) and

227 12.5% (8 of 64) of surviving clones were monoclonal. Wildtype neutral drift theory in  
228 the small intestine predicts 2.2%, 5.5% and 7.8% at these three timepoints (Figure  
229 4C). Together, this suggests that either the clone dynamics of tumours changes over

230 time or that they are heterogeneous with some glands showing accelerated dynamics.

231 The spatial distribution of clones and tumour size were explored to determine if  
232 different behaviours related to proximity to the tumour edge or the size of the tumour,  
233 but no obvious trend was observed (Figures 4D and S5A). To explore whether this

234 effect was due to some glands showing accelerated dynamics (i.e the monoclonal

235 glands) the monoclonal proportion in the tumour dataset was rescaled to be identical  
236 to the data recorded outside of tumours. This analysis showed that even after  
237 rescaling, the intracrypt clonal dynamics within tumours was accelerated compared to  
238 that of external crypts (Figure 4E). Such variable behaviour precludes deriving stem  
239 cell metrics using neutral drift theory but indicate that the tumour glands arising from  
240 stabilisation of  $\beta$ -catenin all show accelerated but variable clone dynamics leading to  
241 monoclonality.

242

243 In considering the clone dynamics of the background clones in tumour bearing mice  
244 we next considered the impact of tumours on their behaviour. The size distribution of  
245 clones was determined with respect of their proximity to tumours by applying a rolling  
246 window moving away from the tumour that always contained the same number of  
247 clones. This analysis revealed that crypts closer to tumours had appreciably smaller  
248 clones reflecting slower drift dynamics and longer times to achieve monoclonality  
249 despite not being appreciably different in size (Figures 4F and S5B). This trend did not  
250 vary with the size of tumours (Figure S5C). Calculation of stem cell replacement rates  
251 confirmed that these were reduced in tumour adjacent crypts (Figures 4G and S5D).  
252 These findings suggest that tumours create an inhibitory local environment that slows  
253 stem cell replacement processes in adjacent crypts.

254

255 Together these observations show that RDre<sup>Pr</sup> can be used for lineage tracing to  
256 reveal the altered stem cell behaviours arising as a consequence of stabilisation of  $\beta$ -  
257 catenin and in the resultant tumours.

258

259 **Discussion**

260 The bulk of somatically induced, genetically engineered mouse models depend on the  
261 regulated activity of Cre-recombinase. Use of appropriate promoter elements and/or  
262 post-translational ligand-dependent regulation allows gene specific changes to be  
263 mediated at different developmental stages, in specified tissues, at known times and  
264 to varying extents. In parallel, Cre-activated reporters have offered a route to  
265 determining altered cell fates and properties. Here we have shown that Dre<sup>Pr</sup> is  
266 activated in a dose-dependent manner in various tissues and can be used for lineage  
267 tracing in the small intestine and colon with a robustness that allows for detailed  
268 interpretation of quantitative data. In addition, Dre<sup>Pr</sup> can be combined with Cre-  
269 mediated models as shown by the lineage tracing following stabilisation of  $\beta$ -catenin  
270 driven tumours.

271

272 A prerequisite for lineage tracing is to have minimal reporter background  
273 recombination in the absence of inducer. Importantly, RDre<sup>Pr</sup> mice show no  
274 background activity. In contrast, models that rely on highly efficient recombination to  
275 achieve tissue wide alterations in gene expression (e.g. *Villin*<sup>CreErt</sup> in intestinal studies)  
276 are often subject to significant background recombination. It follows that such models  
277 are inappropriate for sporadic induced recombination or clonal lineage tracing. Hence  
278 the RDre<sup>Pr</sup> mouse line is an appropriate tool for low frequency recombination with  
279 minimal background.

280

281 This is the first description of a recombination driven sequential model for lineage  
282 tracing in intestinal tumours. The results show that clone bearing tumours in the  
283 *AhCre*<sup>Ert</sup>; *Ctnnb1*<sup>lox(ex3)</sup>; RDre<sup>Pr</sup>; RtdTom<sup>r<sup>sr</sup></sup> model contains an average of 4 clones at the  
284 end of the experimental animal life span. The surviving clones observed in the 2-3

285 week interval following lineage tracing have predominantly populated whole tumour  
286 glands. In this regard the current findings are consistent with our previous study using  
287 an approach of ‘continuous labelling’ in which analysis of spontaneous mutations  
288 within the glands of spontaneous *Apc*<sup>min</sup> adenomas indicated that these are  
289 maintained by a small number of clonogenic stem cells between which there is a high  
290 rate of replacement. However, here using the additional resolution of a pulse-chase  
291 approach mediated by Dre<sup>Pr</sup> we further identify heterogeneity in the clone dynamics of  
292 individual tumour glands in the *Ctnnb1*<sup>lox(ex3)</sup> model.

293

294 In considering the clonal dynamics of the background epithelium in intestines heavily  
295 ‘peppered’ with tumours we determined that proximity to a tumour slows the inferred  
296 rate of stem cell replacement. Many reports have indicated that the impact of the  
297 mutations that cause colorectal cancers by hyperactivating the Wnt signalling pathway  
298 also cause induction of secreted negative feedback inhibitors or of other pathways that  
299 would normally act to downregulate Wnt signalling (González-Sancho et al., 2005;  
300 Kakugawa et al., 2015; Koo et al., 2012; Mishra et al., 2019). It appears likely that  
301 some of these are acting in a non-cell (or gland) autonomous manner and are  
302 additionally slowing the stem cell competitive replacement process in nearby crypts.  
303 Determining the significance of this phenomenon is beyond the scope of this report  
304 but we speculate that there may be a form of inter-gland competition such that tumour  
305 glands promote their growth by reducing the fitness of adjacent wildtype crypts.

306

307 Together, these observations demonstrate the utility of mammalian expressed Dre<sup>Pr</sup>  
308 specifically and of secondary lineage tracing in general to describe and understand  
309 complex pathologies that progress with time. The approach may be particularly

310 relevant to documenting the nature and efficacy of therapeutic interventions applied at  
311 different stages of disease progression.

312

### 313 **Acknowledgments**

314 This work was supported by Cancer Research UK (to A.K.T, R.K., M.C, F.L and  
315 D.J.W.) and by the Wellcome Trust, grant 103805 (to A.K.T and D.J.W). We thank the  
316 Histopathology and Pre-Clinical Genome Editing cores and the Biological Resources  
317 Unit at the CRUK Cambridge Institute for transgenic generation and technical support.  
318

### 319 **Author Contributions**

320 Conceptualization, D.J.W., A.K.T., and R.K.; Methodology, R.K., D.J.W., and A.K.T.;  
321 Formal Analysis, A.K.T, D.K., and E.M.; Investigation, A.K.T., D.K., M.C and F.C.L;  
322 Writing – Original Draft, D.J.W., and A.K.T.; Writing – Review & Editing, A.K.T., D.K.,  
323 D.J.W., and E.M.; Visualization, A.K.T.; Supervision, D.J.W., R.K., and E.M.; Project  
324 Administration, D.J.W.; Funding Acquisition, D.J.W.

325

### 326 **Declaration of Interests**

327 The authors declare no competing interests.

328

### 329 **Figure titles and legends**

330 **Figure 1: Clonal recombination induced by Dre<sup>Pr</sup>. (A-D)** Expression of tdTomato in  
331 tissues shown from RDre<sup>Pr</sup>;RtdTom<sup>rsr</sup> animals 14 days following i.p. injection of 240  
332 mg Ru486. **(E-G)** Confocal images showing expression of tdTomato in the crypts of  
333 small intestinal wholemounts of RDre<sup>Pr</sup>;RtdTom<sup>rsr</sup> animals 14 days following i.p.  
334 injection of Ru486 at the doses shown **(H, I)** Bar-graph showing quantification of the

335 number of tdTom<sup>+</sup> crypt clones/cm in small intestinal (H) or colon tissue (I), (N=3;  
336 mean +/- SD). **(J)** small intestinal crypt from a RDre<sup>Pr</sup>;RtdTom<sup>rsr</sup> animal 24 hours after  
337 receiving 50 mg/kg Ru486 by i.p. injection showing a single tdTomato<sup>+</sup> cell not  
338 expressing Paneth cell marker (Ulex lectin). **(K-O)** Confocal images of tdTomato<sup>+</sup>  
339 clones from the same animals as for E-I. Colon section visualised for Goblet cells  
340 (Muc2) (K). Small intestinal sections (L-O) visualised for Goblet cells (Muc2) (L),  
341 visualised for Paneth cells (Lysozyme) (M), visualised for tuft cells (Dlck2) (N) and  
342 visualised for enteroendocrine cells (Chromogranin A) (O). All scalebars = 50µm.

343

344 **Figure 2: Stem cell dynamics inferred from intestinal clone size distributions in**  
345 **RDre<sup>Pr</sup>;RtdTom<sup>rsr</sup> mice.** **(A)** Schematic of experimental set-up. RDre<sup>Pr</sup>;RtdTom<sup>rsr</sup> and  
346 AhCre<sup>Ert</sup>;RtdTom<sup>Isl</sup> animals were administered a single dose of 50mg/kg Ru486 or  
347 40mg/kg β-naphthoflavone (BNF) plus 0.15mg Tamoxifen (Tam), respectively. **(B)**  
348 Confocal microscopy images of small intestinal clones demonstrating segmental  
349 scoring in eighths of clone sizes (viewed from crypt base) from RDre<sup>Pr</sup>;RtdTom<sup>rsr</sup> and  
350 AhCre<sup>Ert</sup>;RtdTom<sup>Isl</sup> animals. (Scalebar= 50µm) **(C,D)** Average clone sizes with time in  
351 small intestine (SI) (C) and colon (D) derived from RDre<sup>Pr</sup>;RtdTom<sup>rsr</sup> and  
352 AhCre<sup>Ert</sup>;RtdTom<sup>Isl</sup> animals. (Mean+/- SD) (N=3). **(E-H)** Heatmap representing colour-  
353 coded clone size prevalence over time during lineage tracing in RDre<sup>Pr</sup>;RtdTom<sup>rsr</sup> SI  
354 (E) and colon (G) or AhCre<sup>Ert</sup>;RtdTom<sup>Isl</sup> SI (F) and colon (H). Darkest colour  
355 corresponds to most prevalent clone sizes at a given timepoint. **(I-J)** Mathematical  
356 modelling (line) showing predicted average clone sizes from day 0-100 in small  
357 intestine (SI) (I) and colon (J) based on the data shown in C,D (points). **(K-N)** Inferred  
358 stem cell number per crypt (y-axis) and stem cell replacement rate per stem cell per

359 day (x-axis) in SI (K) and colon (L) of RDre<sup>Pr</sup>;RtdTom<sup>rsr</sup> animals and SI (M) and colon  
360 (N) AhCre<sup>Ert</sup>;RtdTom<sup>lsl</sup> animals.

361

362 **Figure 3: Activation of Dre<sup>Pr</sup> allows lineage tracing within intestinal tumours**  
363 **initiated by Cre-mediated stabilisation of  $\beta$ -catenin. (A-B)**  $\beta$ -naphthoflavone (BNF)

364 and Tamoxifen (Tam) induces recombination of loxP but not rox sites in AhCre<sup>Ert</sup>

365 animals and not at rox sites in RDre<sup>Pr</sup> animals. (A) Confocal microscopy images of

366 small intestine and colon from AhCre<sup>Ert</sup>;RtdTom<sup>lsl</sup>, AhCre<sup>Ert</sup>;RtdTom<sup>rsr</sup> and

367 RDre<sup>Pr</sup>;RtdTom<sup>rsr</sup> animals treated as shown. Scale bar=200 $\mu$ m (B) Flow cytometry

368 quantification of tdTom<sup>+</sup> cells in proximal small intestine from above animals. Cells

369 were stained with EpCam (Alexa 647) and DAPI. (C) Schematic representation of

370 experimental set-up. Tissue was collected at humane endpoint. (D) Whole-mount of

371 intestine at maximum tumour burden. Macroscopic tumours are circled. (E) Dissection

372 microscopy picture of whole-mounted small intestinal (SI) tumours with tdTom<sup>+</sup>

373 clones. Overlay of the brightfield (BF) and 555nm channel (tdTom). (F) Section

374 showing intestinal tumour (blue line) with IHC for  $\beta$ -catenin. Scalebar = 100 $\mu$ m (G)

375 Cross-section of a tumour (white line), containing a tdTom<sup>+</sup> clone. Scalebar = 100 $\mu$ m.

376 (H) Representative confocal microscopy images of multiple tdTom<sup>+</sup> clones in tumour

377 stained for  $\beta$ -catenin (white line). Scalebar = 100 $\mu$ m. (I) Bar-graph summarising the

378 distribution of number of tdTom<sup>+</sup> clones (0 to >8) in tumours from mice culled 13 days

379 (early) or 17-19 days (late) post Ru486 induction (N=62 and 121 respectively). Each

380 datapoint shows mean number of tumours per mouse. (J) Box-plot displaying the

381 average number of clones per tumour (of all tumours containing clones), N=100, data

382 outside the 10th and 90th percentile is displayed as single datapoints. (K) Bar-graph



383 showing the number of tdTom+ clones (1 to >8, binned by 2) in all tumours based on  
384 tumour area ( $\mu\text{m}^2$ ). Each datapoint is a tumour, N=100, error bars = SD.

385

386 **Figure 4: Stem cell dynamics are accelerated within *Ctnnb1* driven tumours but**

387 **are inhibited adjacently to them (A)** Schematic diagram and real example of

388 measurements used to characterise clones inside and outside of tumours. **(B)** Graph

389 displaying average clone size across binned median of tumour sizes. Each bin

390 contains 50 clones. Points and bars show median and interquartile range. **(C)** Graph

391 comparing the proportion of surviving clones that have monoclonally converged within

392 tumours and in surrounding tissue. **(D)** As in (C) but with the intra-tumour data split

393 into those clones that are further from (tumour edge) or closer to the tumour centre

394 (falling without or within 75% of the average tumour radius respectively). **(E)** The

395 proportion of surviving non-fixed clones (in crypt quartiles) inside and outside tumours

396 evolve differently in time when the monoclonal proportion inside tumours has been

397 rescaled to be identical to the monoclonal proportion outside tumours. **(F)** Divergence

398 from theoretical wild type of the clonal dynamics in crypts occupying adjacent intestinal

399 epithelium surrounding  $\beta$ -catenin tumours. Clones are grouped into overlapping bins

400 containing equal numbers of crypts (100 clones per bin) increasing in distance from

401 the edge of the tumour. Line and ribbon shading show the 80% and 95% credible

402 intervals around the median of 1000 simulated data sets of 100 wildtype crypts. Point

403 sizes show the average clone size in each bin. Distances are measured in crypt

404 diameters. **(G)** The daily replacement rate  $\lambda$  of stem cells undergoing neutral drift is

405 inferred for clones in tumour-adjacent epithelium. Close to tumour ( $Re < 7$  crypt

406 diameters)  $\lambda = 0.07$  (80% confidence interval [CI]: 0.061–0.083); far from tumour ( $Re$

407  $\geq 7$  crypt diameters)  $\lambda = 0.09$  (80% CI: 0.079–0.103).

408

## 409 **Methods**

410 **Treatment of animals.** The mice were housed under controlled conditions  
411 (temperature ( $21 \pm 2^\circ\text{C}$ ), humidity ( $55 \pm 10\%$ ), 12h light/dark cycle) in a specific-  
412 pathogen-free (SPF) facility (tested according to the recommendations for health  
413 monitoring by the Federation of European Laboratory Animal Science Associations).  
414 The animals had unrestricted access to food and water, were not involved in any  
415 previous procedures and were test naive. Mice used in this study were 8-16 weeks old  
416 males and females of C57BL/6 background. Ru486 (Sigma, cat. M8046) was  
417 dissolved in 100% ethyl alcohol (Honeywell, cat. E7023) to make a 50 mg/mL solution  
418 and further diluted into a working solution of 10 mg/mL in 40% cyclodextrin/H<sub>2</sub>O.  $\beta$ -  
419 naphthoflavone (Sigma, cat. N3633) was dissolved to a working solution of 8 mg/mL  
420 in corn oil (Sigma, C8267). Tamoxifen (Sigma, cat. T5648) was dissolved in 100%  
421 ethyl alcohol (Honeywell, cat. E7023) to make a 200 mg/mL solution and further diluted  
422 to a working solution of 20 mg/mL, in sunflower oil (Sigma S5007).

423 **Subcutaneous insertion of Ru486 slow release pellet(s) in mice.** This procedure  
424 was carried out by the Biological Resource Unit Core at CRUK CI. Mice receiving pellet  
425 insertion surgery were all 8-10 weeks of age. Mice were placed under general  
426 anaesthesia and a 1 cm subcutaneous incision was made on the back flank of each  
427 mouse in which 1-3 Ru486 pellets (Innovative Research of America, 10 mg/pellet, 90  
428 days release, cat. NX-999) were placed. The wound was closed with surgical glue.

429

430 **Model creation.** The RtdTom<sup>rsrlsl</sup> mouse was bought from the Jackson Laboratories  
431 (stock no. 021876). The deletion of the Isl cassette to generate the RtdTom<sup>rsr</sup> strain  
432 was carried out by the *CRUK CI Genome Editing Core*. RtdTom<sup>rsrlsl</sup> early embryos

433 were cultured with the cell permeable TAT-Cre *in vitro* and embryo transfer was  
434 performed as described by (Ryder et al., 2014). PCR screening was used to ensure  
435 Isl cassette deletion. RDre and RDre<sup>Pr</sup> were generated in house at the *CRUK CI*  
436 *Genome Editing Core* in the Biological Resource Unit by embryonic stem cell  
437 electroporation and homologous recombination of *R26* targeting vectors and  
438 subsequent oocyte injections. A splice acceptor site was inserted immediately before  
439 the Dre sequence and Pr (consisting of the Ru486 responsive mutant hormone binding  
440 domain of the human progesterone receptor hPR891, Kellendonk et al., 1996) was  
441 fused to the N-terminus of Dre (fusion site identical to Anastassiadis *et al.*, 2009)  
442 followed by a Bovine Growth Hormone (BGH) poly-adenylation signal and inserted  
443 into a *R26* targeting vector (Vooijs, et al., 2001). The RDre model lacks the Pr  
444 sequence. ES cell screening for correct 5' integration was carried out by PCR  
445 amplifying with P1 (AGAGTCCTG-ACCCAGGGAAGACATT) and P2 primers  
446 (CATCAAGGAAACCCTGGACTACT-GCG). 3' end integration was confirmed with  
447 primers P3 (GTCACCGAGCTGCAA-GAACTCT) and R2  
448 (GGTGGTGGTGGTGGCATATAC-ATT). Single copy insertion of the vectors was  
449 confirmed by copy number assay before oocyte injection of ES cells.

450

451 **Animal genotyping.** Genotyping was carried out by Transnetyx Inc.

452

453 **Epithelial cell isolation.** Small intestine and colon were dissected, flushed with PBS,  
454 everted and fed onto a glass rod spiral. They were incubated at 37°C in Hank's  
455 Balanced Salt Solution (HBSS) without Ca<sup>+2</sup> and Mg<sup>+2</sup>, containing 10 µM EDTA and  
456 10 mM NaOH. Epithelial cell release was facilitated using a vibrating stirrer (Chemap).  
457 Samples were incubated for 1 h and pulsed every 10 min. Fractions were collected

458 after each pulse, and fresh solution added. Fractions were pooled and washed in cold  
459 2% FBS/PBS. Samples were snap frozen before DNA, RNA or protein isolation, or  
460 stained with antibodies for flow cytometry analysis.

461

462 **Flow cytometry.** Single cell suspension obtained by trypsin treatment was washed  
463 and incubated with an anti-mouse CD326 (EpCAM) AlexaFluor 647 antibody (1:2000,  
464 clone G8.8, Biolegend). DAPI (10  $\mu\text{g}/\text{mL}$ ) was added to distinguish between live and  
465 dead cells. Flow sorting was carried out on a BD FACS Aria SORP (BD Biosciences),  
466 using appropriate single-stained and unstained controls.

467

468 **Whole-mounting.** Tissue was cut open, pinned out luminal side up, and fixed for 3 h  
469 at room temperature in ice-cold 4% PFA in PBS (pH 7.4). Whole-mounts were washed  
470 with PBS, and incubated with demucifying solution (3 mg/mL dithiothreitol (DTT), 20%  
471 ethanol, 10% glycerol, 0.6% NaCl, 10 mM Tris, pH 8.2) for 20 min, and mucus  
472 removed by washing with PBS.

473

474 **Lineage tracing and clone quantification.** For lineage tracing mice were induced  
475 with a pulse of  $\beta$ -naphthoflavone and tamoxifen (40 mg/kg and 0.15 mg, respectively)  
476 or Ru486 (50 mg/kg) and tissue was whole mounted at day 4, 7, 10, 14 and 21 after  
477 pulse administration. Clone sizes were scored manually under a fluorescent  
478 microscope using the 550 nm filter. 2 cm of tissue was mounted muscle side up, on a  
479 glass-slide and clone sizes were scored as fractions of 8. All tissue was scored  
480 blinded. 3 mice per timepoint were quantified. In  $\text{RDre}^{\text{Pr}};\text{RtdTom}^{\text{rsr}}$  animals an average  
481 of 100-250 and 85-170 clones/animal/timepoint were quantified in the small intestine  
482 and colon, respectively. In  $\text{AhCre}^{\text{Ert}};\text{RT}^{\text{Isl}}$  animals an average of 200-300 and 175-300

483 clones/animal/timepoint were quantified in the small intestine and colon, respectively.  
484 Highest clone numbers were found at earliest timepoints. For number of clones/cm  
485 quantification, the number of clones was scored in 2-3cm of whole-mounted tissue as  
486 described above.

487

488 **Tissue clearing of tumour tissue.** Whole-mounted tumour tissue was fixed in 4%  
489 PFA overnight at 4°C. Hereafter, tissue was washed in PBS for 8-hours at room  
490 temperature. Tissue was then incubated in CUBIC-1A solution (10% Triton, 5%  
491 NNNN-tetrakis (2-HP) ethylenediamine (Sigma, 122262), 10% Urea, 25mM NaCl) with  
492 DAPI 1:100 (10 mg/mL stock) at 37°C 60 RPM for a total of 5 days. On day 2 and 4  
493 CUBIC-1A + DAPI was refreshed (Susaki and Ueda, 2016). After CUBIC-1A  
494 incubation, tissue was washed in PBS for 2 hours and then placed in RapiClear  
495 (SunJin Lab., cat. RC152002) and incubated at room temperature until tissue was see-  
496 through. Hereafter, tissue was mounted on 1 mm inserts (iSpacer, SunJin Lab.) on  
497 glass-slides in RapiClear and subjected to imaging on a TCS SP5 confocal  
498 microscope (Leica).

499

500 **Antibody staining of whole organs.** Whole-mounted intestinal tissue: sections were  
501 washed in 0.1% PBS-T for 2 days, and blocked in 10% donkey serum in PBS overnight  
502 at 4°C, incubated with an anti-mouse CD326 (EpCAM) AlexaFluor 647 antibody  
503 (1:100, clone G8.8, Biolegend 118201), Ulex-Lectin 488 (1:100, Sigma 19337) and  
504 DAPI (10 µg/mL). Finally, the tissue was washed with PBS-T for 1 day before imaging.  
505 Whole-mounted intestinal tissue carrying tumours was covered in OCT and placed at  
506 -80°C over-night, then washed in 0.5% PBS-T for 2 days at 4°C and blocked in 10%  
507 donkey serum over-night. The tissue was then stained with  $\beta$ -catenin (1:100, Cell

508 Signalling 9587) and DAPI (10 µg/mL) in PBS-T for 3 days at 4°C, washed for 1 day,  
509 incubated with donkey anti rabbit 488 secondary antibody (1:500, Thermo Fisher, A-  
510 21206) for 2 days at 4°C, followed by a 1-day wash in PBS-T. Hereafter, the tissue  
511 was placed in Rapi Clear (SunJin Lab., cat. RC152002) and incubated at room  
512 temperature for 2-days before imaging. The bladder, trachea, oesophagus and  
513 caecum: were whole-mounted and then incubated in CUBIC1-A for 5 days (see tissue  
514 clearing), washed in 0.5% PBS-T for 2 days at 4°C, blocked in 10% donkey serum in  
515 PBS overnight and then incubated with Anti-pan Cytokeratin (1:100, Abcam  
516 ab236323) and DAPI (10 µg/mL) for 3 days at 4°C. The tissue was washed and  
517 incubated with donkey anti rabbit 488 secondary antibody (1:500, Thermo Fisher, A-  
518 21206) for 2 days at 4°C, followed by another 1-day wash in PBS-T before being  
519 placed in Rapi Clear (SunJin Lab., cat. RC152002) and incubated at room temperature  
520 until see-through.

521

522 **Immunofluorescence:** tissue was excised and fixed for 48 h in 4% PFA in PBS at  
523 4°C, after which it was transferred to 20% sucrose solution. After cryosectioning  
524 antigen retrieval was accomplished by incubating the slides in 1% SDS for 5 min.  
525 Blocking was performed with 10% donkey serum. Following wash, primary antibodies  
526 were added and incubated overnight at 4°C. The following primary antibodies were  
527 used: rabbit FITC-anti-Lyz (1:400, Dako, F037201), rabbit anti-Muc2 (1:50, Santa  
528 Cruz, sc-15334), rabbit anti-ChgA (1:100, Abcam, ab15160), and rabbit anti-Dclk1  
529 antibody (1:1000, Abcam, ab31704). Secondary detection was with AlexaFluor 488  
530 donkey anti-rabbit secondary antibody (1:500, Thermo Fisher, A-21206) and DAPI  
531 (10 µg/mL). Fluorescent imaging was carried out on a TCS SP5 confocal microscope  
532 (Leica).

533

534 **Immunohistochemistry.** The small intestine and colon were opened and fixed for 24  
535 hour in 4% PFA. The tissue was paraffin embedded and sectioned. RFP and  $\beta$ -catenin  
536 immunohistochemistry were carried out using a Bond Max autostainer (Leica), with  
537 sodium citrate, pH 6.0 (10mM) antigen retrieval. Slides were blocked with 3%  
538 hydrogen peroxide, followed by incubation an Avidin/Biotin Blocking Kit (Vector  
539 Laboratories). Anti-RFP (1:100, Abcam ab34771) and  $\beta$ -catenin (BD biosciences  
540 610154, 0.25 ug/mL) primary antibodies were used. For  $\beta$ -catenin IHC a mouse-on-  
541 mouse blocking step was added (Vector, MKB-2213). Secondary antibodies were;  
542 biotinylated donkey and biotinylated donkey anti-rabbit (1:250, Jackson  
543 ImmunoResearch, 711-065-152) and biotinylated rabbit anti-mouse IgG1 (1:500,  
544 Abcam ab125913). Slides were incubated with Streptavidin coupled with horseradish  
545 peroxidase (HRP), and colour developed using diaminobenzidine (DAB) and DAB  
546 Enhancer (Leica).

547

548 **Clonal analysis in tumours:** to quantify clone sizes in and outside tumours as well  
549 as their spatial distribution, we defined each tumour centre ( $T_c$ ), distance from clones  
550 inside to  $T_c$  ( $R_c$ ), distance from clones in adjacent tissue to tumour edge ( $R_e$ ), clone  
551 sizes (as a fraction of 8) as well as crypt sizes of clones in each tiled image from  
552 animals presented in Figure 3C-K. In 4 animals a total of 100 (25 per animal) tumours  
553 were analysed.

554

555 **Computational analysis**

556 Neutral drift model

557 As described in previous work (Lopez-Garcia et al., 2010; Snippert et. al. 2010;  
 558 Vermeulen et al., 2013; Kozar et al., 2013) the intra-crypt clonal dynamics of stem  
 559 cells in the murine small intestine and colon can be accurately described via the  
 560 stochastic neutral drift theory, wherein a subset N of equipotent crypt base columnar  
 561 cells undergo a continuous process of replacing their neighbours or themselves being  
 562 replaced, with replacements occurring at a daily rate  $\lambda$ . The time evolution of this  
 563 stochastic clonal expansion and contraction assuming a single stem cell is labelled at  
 564 time  $t=0$  can be captured via solution of the continuous-time Master equation for a  
 565 one-dimensional random walk with absorbing boundaries at 0 and N (clonal extinction  
 566 and monoclonal convergence, respectively):

$$567 \quad \frac{dP_0}{dt} = \lambda P_1, \frac{dP_1}{dt} = \lambda P_2 - 2\lambda P_1, \frac{dP_n}{dt} = \lambda P_{n-1} - 2\lambda P_n + \lambda P_{n+1}, (1 < n < N - 1)$$

$$\frac{dP_{N-1}}{dt} = \lambda P_{N-2} - 2\lambda P_{N-1}, \frac{dP_N}{dt} = \lambda P_{N-1},$$

568 where  $P_n(t)$  is the probability that a clone has reached a size n by time t, and  $P_1(0) =$   
 569 1,  $P_{n \neq 1}(0) = 0$  define the initial conditions. The solution of the above system (as  
 570 described in Lopez-Garcia et al., 2010) is

$$571 \quad P_0(t) = \frac{2}{N} \sum \cos^2 \left( \frac{\pi m}{2N} \right) e^{-4\lambda \sin^2 \left( \frac{\pi m}{2N} \right) t},$$

$$P_n(t) = \frac{2}{N} \sum \sin \left( \frac{\pi m}{N} \right) \sin \left( \frac{\pi m n}{N} \right) e^{-4\lambda \sin^2 \left( \frac{\pi m}{2N} \right) t}, \text{ for } 1 \leq n \leq N - 1,$$

$$P_N(t) = \frac{2}{N} \sum (-1)^{m+1} \cos^2 \left( \frac{\pi m}{2N} \right) e^{-4\lambda \sin^2 \left( \frac{\pi m}{2N} \right) t}.$$

572 In order to fit the neutral drift model to count data of clone sizes, there are three  
 573 adjustments that need to be made: (i) The probabilities  $P_n(t)$  must be rescaled to model  
 574 surviving clones,  $P'_n = P_n / (1 - P_0)$ , such that the  $P'_n$  sum to one for  $n > 0$  for all t; (ii) The  
 575  $P'_n$  must be redistributed into the number of bins that were used to score the clone  
 576 sizes, in this case eighths; (iii) The delay between tamoxifen administration and the  
 577 accrual of the stem cell label is included as a time delay parameter  $\tau$ . Then, count data



578 X is modelled as a multinomial with  $P'_n$  – now a function of the model parameters  $\lambda$ ,  
579 N and  $\tau$  – as the case probabilities:

$$580 \quad L(X|\lambda, N, \tau) = \prod_t \text{Multinomial}[X_n(t)|P'_n(t, \lambda, N, \tau)],$$

581 where  $X_n(t)$  is the vector of counts of clone sizes  $1 \leq n \leq N$  observed at time  $t$ . The priors  
582 and associated hyperparameters were

$$583 \quad \begin{aligned} \pi(\lambda) &= \text{Gamma}(10^{-3}, 10^{-3}), \\ \pi(N) &= \text{Uniform}(2, 30), \\ \pi(\tau) &= \text{Gamma}(10^{-3}, 10^{-3}), \end{aligned}$$

584 which were chosen to be uninformative.

585 Using this Bayesian inference model, Markov Chain Monte Carlo (MCMC) simulations  
586 were used to produce draws of the neutral drift parameters for the wildtype small  
587 intestine as shown in Fig 2K. In all MCMC sampling herein, 40000 iterations were  
588 performed on two parallel chains each with a burn in of 5000 iterations, with the results  
589 thinned by a factor of 20. From this inference, only a well-resolved value for the time  
590 delay parameter was desired to use in the tumour analysis. The time points were 4, 7,  
591 10, 14 and 21 days post induction at which 692, 595, 592, 457 and 302 clones were  
592 observed, respectively. The parameter value was found to be  $\tau = 2.45$  (95% credible  
593 interval [CI]: 2.07–2.75). This was taken as the Dre technology-intrinsic time delay and  
594  $\tau_{\text{glob}} = \tau$  was defined for use in all future computations.

595

596 Divergence from wild type. All tumour lineage tracing data (internal and external  
597 tissue) was taken from SI1. Therefore, the pulse-chase neutral drift theory with  $N_{\text{WT}} =$   
598 5 stem cells with  $\lambda_{\text{WT}} = 0.1$  daily replacements (Kozar et al., 2013) was used as the  
599 baseline wild type behaviour and investigate whether and by how much the observed  
600 data diverges from it. The theoretical results were split symmetrically into 8 bins to

601 match the eighths used to measure the clone sizes, though symmetry is broken to  
602 maintain the identity of monoclonals. This gives a theoretical distribution of clone sizes  
603  $P'_n(t)$ ,  $1 \leq n \leq 8$ , occupied by surviving clones at a given time  $t$  post labelling, as defined  
604 in the neutral drift model section.

605 To investigate the effect on clonal dynamics of proximity to a tumour, the putatively  
606 normal tissue surrounding tumours was binned radially from the edge of the tumour  
607 outwards, increasing in distance from the tumour (like the rings of a target). To achieve  
608 statistical power and allow between-bin comparison these bins were allowed to  
609 overlap such that each bin contained 100 clones (thus each clone was assigned to  
610 one or more bins) but the median distance of crypts from the tumour edge in  
611 subsequent bins increased monotonically. The likelihood under the theoretical  
612 multinomial model for the pooled clone sizes in bin  $b$  and time point  $t$ ,  $C_b(t)$  is given by

$$613 \quad L(C_b | \lambda_{WT}, N_{WT}, \tau) = \prod_t \text{Multinomial}[C_b(t) | P'_n(t, \lambda_{WT}, N_{WT}, \tau)],$$

614 where is the number of crypts in bin  $b$  that arose from time point  $t$ . The value of the  
615 time delay  $\tau$  is fixed at the value inferred from the control data as described in the  
616 previous section. The likelihood for bin  $b$  explains how well the theoretical wild type  
617 model describes the data observed in that spatial bin in tissue external to a tumour.

618 In order to interpret these results a null distribution on the likelihood was created by  
619 simulating counts from the theoretical multinomial model,  $C_{sim} \sim \text{Multinom}(P'_n(t), n_b)$ ,  
620 where  $n_b$  is the bin size (100 clones) and where the proportion of clones from each  
621 time point was the same as that in the data. Counts were generated one thousand  
622 times and the likelihood of each simulation under the theoretical model was calculated.  
623 The credible intervals resulting from these simulations were used to judge whether the  
624 clones in the binned data were undergoing perturbed dynamics or were within the  
625 variability expected from finite sampling.

626

### 627 Quantifying the clonal dynamics close to tumours

628 To quantify the effect of tumours on the clonal dynamics in tumour-adjacent crypts the  
629 data set was split into two subsets: those crypts displaying dynamics not well  
630 described by the wildtype theory (those outside the 95% credible interval of the  
631 simulated null distribution, 140 crypts) and those displaying dynamics that are well  
632 described by the wildtype theory (those inside the 95% credible interval, 125 crypts).  
633 The value of the radial distance cut-off that this corresponded to is 6.99 crypt diameters  
634 (454  $\mu\text{m}$ ). The neutral drift replacement rate  $\lambda$  was inferred for each data set using a  
635 modified version of the MCMC algorithm described above, wherein the delay  
636 parameter and the number of stem cells were fixed to  $\tau = \tau_{\text{glob}}$  and  $N = N_{\text{WT}}$  in order to  
637 make the replacement rate identifiable.

638

### 639 Binning clones

640 Two methods of binning were used to group clones into statistically powered subsets  
641 with respect to a measurement, say  $X$ . First, overlapping bins with a constant number  
642 of clones in each but a variable width in the parameter  $X$  (used in Figs 4F and S5B-C,  
643 with Fig 4B having an overlap of zero bar the point at the far right which overlaps its  
644 neighbouring point in order to maintain constant bin size). Second, non-overlapping  
645 bins that equally divide the parameter  $X$  such that each bin can have a different  
646 number of clones (used in Fig S5A)

647

### 648 Rescaling monoclonals

649 To compare the evolution in time of partial clone sizes (those clones that have not  
650 become fixed in a gland) within tumours and in tumour-adjacent epithelium, the large

651 monoclonal bias inside tumours was first scaled away (this is necessary as we work  
652 in proportions). The rescaled and re-normalised intra-tumour clone sizes  $\mathcal{C}$  were  
653 calculated as:

$$654 \quad \mathcal{C}_i = (1 - C_N^{Adj}) \frac{C_i}{\sum_{j=1}^{N-1} C_j}, \text{ for } i \in [1, N - 1], \text{ and } \mathcal{C}_N = C_N^{Adj},$$

655 where  $C$  is the raw intra-tumour clone size distribution and  $C_N^{Adj}$  is the proportion of  
656 monoclonals in the clone size distribution of the tumour-adjacent tissue. The results  
657 are shown in Fig 4E.

658

## 659 **References**

- 660 Anastasiadis, K., Fu, J., Patsch, C., Hu, S., Weidlich, S., Duerschke, K., Buchholz,  
661 F., Edenhofer, F., and Stewart, A.F. (2009). Dre recombinase, like Cre, is a highly  
662 efficient site-specific recombinase in E. coli, mammalian cells and mice. *Dis. Model.*  
663 *Mech.* 2, 508–515.
- 664 Cheung, A.F., Carter, A.M., Kostova, K.K., Woodruff, J.F., Crowley, D., Bronson,  
665 R.T., Haigis, K.M., and Jacks, T. (2009). Complete deletion of Apc results in severe  
666 polyposis in mice. *Oncogene* 29, 1857–1864.
- 667 Choi, W.-S., Kim, H.-W., Tronche, F., Palmiter, R.D., Storm, D.R., and Xia, Z. (2017).  
668 Conditional deletion of Ndufs4 in dopaminergic neurons promotes Parkinson's  
669 disease-like non-motor symptoms without loss of dopamine neurons. *Sci. Rep.* 7,  
670 44989.
- 671 EUCOMM (2019). Genoway.
- 672 Ghosh, M., Brechbuhl, H.M., Smith, R.W., Li, B., Hicks, D.A., Titchner, T., Runkle,  
673 C.M., and Reynolds, S.D. (2011). Context-Dependent Differentiation of Multipotential  
674 Keratin 14–Expressing Tracheal Basal Cells. *Am. J. Respir. Cell Mol. Biol.* 45, 403–

675 410.

676 Giroux, V., Lento, A.A., Islam, M., Pitarresi, J.R., Kharbanda, A., Hamilton, K.E.,

677 Whelan, K.A., Long, A., Rhoades, B., Tang, Q., et al. (2017). Long-lived keratin 15+

678 esophageal progenitor cells contribute to homeostasis and regeneration. *J. Clin.*

679 *Invest.* 127, 2378–2391.

680 González-Sancho, J.M., Aguilera, O., García, J.M., Pendás-Franco, N., Peña, C.,

681 Cal, S., de Herreros, A.G., Bonilla, F., and Muñoz, A. (2005). The Wnt antagonist

682 DICKKOPF-1 gene is a downstream target of  $\beta$ -catenin/TCF and is downregulated in

683 human colon cancer. *Oncogene* 24, 1098–1103.

684 Harada, N., Tamai, Y., Ishikawa, T.-O., Sauer, B., Takaku, K., Oshima, M., and

685 Taketo, M.M. (1999). Intestinal polyposis in mice with a dominant stable mutation of

686 the  $\beta$ -catenin gene. *EMBO J.* 18, 5931–5942.

687 Hermann, M., Stillhard, P., Wildner, H., Seruggia, D., Kapp, V., Sánchez-Iranzo, H.,

688 Mercader, N., Montoliu, L., Zeilhofer, H.U., and Pelczar, P. (2014). Binary

689 recombinase systems for high-resolution conditional mutagenesis. *Nucleic Acids*

690 *Res.* 42, 3894–3907.

691 Ishibashi, S., Brown, M.S., Goldstein, J.L., Gerard, R.D., Hammer, R.E., and Herz, J.

692 (1993). Hypercholesterolemia in low density lipoprotein receptor knockout mice and

693 its reversal by adenovirus-mediated gene delivery. *J. Clin. Invest.* 92, 883–893.

694 Kakugawa, S., Langton, P.F., Zebisch, M., Howell, S.A., Chang, T.-H., Liu, Y., Feizi,

695 T., Bineva, G., O'Reilly, N., Snijders, A.P., et al. (2015). Notum deacylates Wnt

696 proteins to suppress signalling activity. *Nature* 519, 187–192.

697 Kellendonk, C., Tronche, F., Monaghan, a. P., Angrand, P.O., Stewart, F., and

698 Schütz, G. (1996). Regulation of Cre recombinase activity by the synthetic steroid

699 RU 486. *Nucleic Acids Res.* 24, 1404–1411.

700 Kemp, R. (2004). Elimination of background recombination: somatic induction of Cre  
701 by combined transcriptional regulation and hormone binding affinity. *Nucleic Acids*  
702 *Res.* 32, e92–e92.

703 Van Keymeulen, A., Rocha, A.S., Ousset, M., Beck, B., Bouvencourt, G., Rock, J.,  
704 Sharma, N., Dekoninck, S., and Blanpain, C. (2011). Distinct stem cells contribute to  
705 mammary gland development and maintenance. *Nature* 479, 189–193.

706 Koo, B.-K., Spit, M., Jordens, I., Low, T.Y., Stange, D.E., van de Wetering, M., van  
707 Es, J.H., Mohammed, S., Heck, A.J.R., Maurice, M.M., et al. (2012). Tumour  
708 suppressor RNF43 is a stem-cell E3 ligase that induces endocytosis of Wnt  
709 receptors. *Nature* 488, 665–669.

710 Kozar, S., Morrissey, E., Nicholson, A.M., van der Heijden, M., Zecchini, H.I., Kemp,  
711 R., Tavaré, S., Vermeulen, L., and Winton, D.J. (2013). Continuous Clonal Labeling  
712 Reveals Small Numbers of Functional Stem Cells in Intestinal Crypts and  
713 Adenomas. *Cell Stem Cell* 13, 626–633.

714 Lopez-Garcia, C., Klein, A.M., Simons, B.D., and Winton, D.J. (2010). Intestinal stem  
715 cell replacement follows a pattern of neutral drift. *Science* 330, 822–825.

716 Madisen, L., Garner, A.R., Shimaoka, D., Chuong, A.S., Klapoetke, N.C., Li, L., van  
717 der Bourg, A., Niino, Y., Egolf, L., Monetti, C., et al. (2015). Transgenic mice for  
718 intersectional targeting of neural sensors and effectors with high specificity and  
719 performance. *Neuron* 85, 942–958.

720 Marino, S., Vooijs, M., van Der Gulden, H., Jonkers, J., and Berns, A. (2000).  
721 Induction of medulloblastomas in p53-null mutant mice by somatic inactivation of Rb  
722 in the external granular layer cells of the cerebellum. *Genes Dev.* 14, 994–1004.

723 Matsuda, S., Giliberto, L., Matsuda, Y., McGowan, E.M., and D’Adamio, L. (2008).  
724 BRI2 inhibits amyloid beta-peptide precursor protein processing by interfering with

725 the docking of secretases to the substrate. *J. Neurosci.* 28, 8668–8676.

726 Mishra, S., Bernal, C., Silvano, M., Anand, S., and Ruiz i Altaba, A. (2019). The  
727 protein secretion modulator TMED9 drives CNIH4/TGF $\alpha$ /GLI signaling opposing  
728 TMED3-WNT-TCF to promote colon cancer metastases. *Oncogene* 38, 5817–5837.

729 Papafotiou, G., Paraskevopoulou, V., Vasilaki, E., Kanaki, Z., Paschalidis, N., and  
730 Klinakis, A. (2016). KRT14 marks a subpopulation of bladder basal cells with pivotal  
731 role in regeneration and tumorigenesis. *Nat. Commun.* 7, 11914.

732 Park, J.T., and Leach, S.D. (2013). TAILOR: transgene activation and inactivation  
733 using lox and rox in zebrafish. *PLoS One* 8, e85218.

734 Plummer, N.W., Evsyukova, I.Y., Robertson, S.D., Marchena, J. de, Tucker, C.J.,  
735 and Jensen, P. (2015). Expanding the power of recombinase-based labeling to  
736 uncover cellular diversity. *Development* 142, 4385.

737 Ryder, E., Doe, B., Gleeson, D., Houghton, R., Dalvi, P., Grau, E., Habib, B.,  
738 Miklejewska, E., Newman, S., Sethi, D., et al. (2014). Rapid conversion of  
739 EUCOMM/KOMP-CSD alleles in mouse embryos using a cell-permeable Cre  
740 recombinase. *Transgenic Res.* 23, 177–185.

741 Sadowski, P.D. (1995). The Flp Recombinase of the 2- $\mu$ m Plasmid of *Saccharomyces*  
742 *cerevisiae*. *Prog. Nucleic Acid Res. Mol. Biol.* 51, 53–91.

743 Sajgo, S., Ghinia, M.G., Shi, M., Liu, P., Dong, L., Parmhans, N., Popescu, O., and  
744 Badea, T.C. (2014). Dre - Cre sequential recombination provides new tools for retinal  
745 ganglion cell labeling and manipulation in mice. *PLoS One* 9, e91435.

746 Sauer, B., and McDermott, J. (2004). DNA recombination with a heterospecific Cre  
747 homolog identified from comparison of the pac-c1 regions of P1-related phages.  
748 *Nucleic Acids Res.* 32, 6086–6095.

749 Schepers, A.G., Snippert, H.J., Stange, D.E., van den Born, M., van Es, J.H., van de

750 Wetering, M., and Clevers, H. (2012). Lineage tracing reveals Lgr5+ stem cell activity  
751 in mouse intestinal adenomas. *Science* 337, 730–735.

752 Sinha, M., and Lowell, C.A. (2017). Efficiency and Specificity of Gene Deletion in  
753 Lung Epithelial Doxycycline-Inducible Cre Mice. *Am. J. Respir. Cell Mol. Biol.* 57,  
754 248–257.

755 Snippert, H.J., Haegebarth, A., Kasper, M., Jaks, V., van Es, J.H., Barker, N., van de  
756 Wetering, M., van den Born, M., Begthel, H., Vries, R.G., et al. (2010). Lgr6 marks  
757 stem cells in the hair follicle that generate all cell lineages of the skin. *Science* 327,  
758 1385–1389.

759 Sternberg, N., and Hamilton, D. (1981). Bacteriophage P1 site-specific  
760 recombination: I. Recombination between loxP sites. *J. Mol. Biol.* 150, 467–486.

761 Stremmel, W., Staffer, S., Schneider, M.J., Gan-Schreier, H., Wannhoff, A.,  
762 Stuhmann, N., Gauss, A., Wolburg, H., Mahringer, A., Swidsinski, A., et al. (2017).  
763 Genetic Mouse Models with Intestinal-Specific Tight Junction Deletion Resemble an  
764 Ulcerative Colitis Phenotype. *J. Crohns. Colitis* 11, 1247.

765 Susaki, E.A., and Ueda, H.R. (2016). Whole-body and Whole-Organ Clearing and  
766 Imaging Techniques with Single-Cell Resolution: Toward Organism-Level Systems  
767 Biology in Mammals. *Cell Chem. Biol.* 23, 137–157.

768 Vermeulen, L., Morrissey, E., van der Heijden, M., Nicholson, A.M., Sottoriva, A.,  
769 Buczacki, S., Kemp, R., Tavaré, S., and Winton, D.J. (2013). Defining stem cell  
770 dynamics in models of intestinal tumor initiation. *Science* 342, 995–998.

771 Vooijs, M., Jonkers, J., and Berns, A. (2001). A highly efficient ligand-regulated Cre  
772 recombinase mouse line shows that LoxP recombination is position dependent.  
773 *EMBO Rep.* 2, 292–297.

774 Young, N.P., Crowley, D., and Jacks, T. (2011). Tumor and Stem Cell Biology



775 Uncoupling Cancer Mutations Reveals Critical Timing of p53 Loss in  
776 Sarcomagenesis. *Cancer Res.* 71, 4040–4047.  
777 Zhang, Y., Proenca, R., Maffei, M., Barone, M., Leopold, L., and Friedman, J.M.  
778 (1994). Positional cloning of the mouse obese gene and its human homologue.  
779 *Nature* 372, 425–432.  
780 (2019). *Jax.org*.  
781  
782  
783  
784

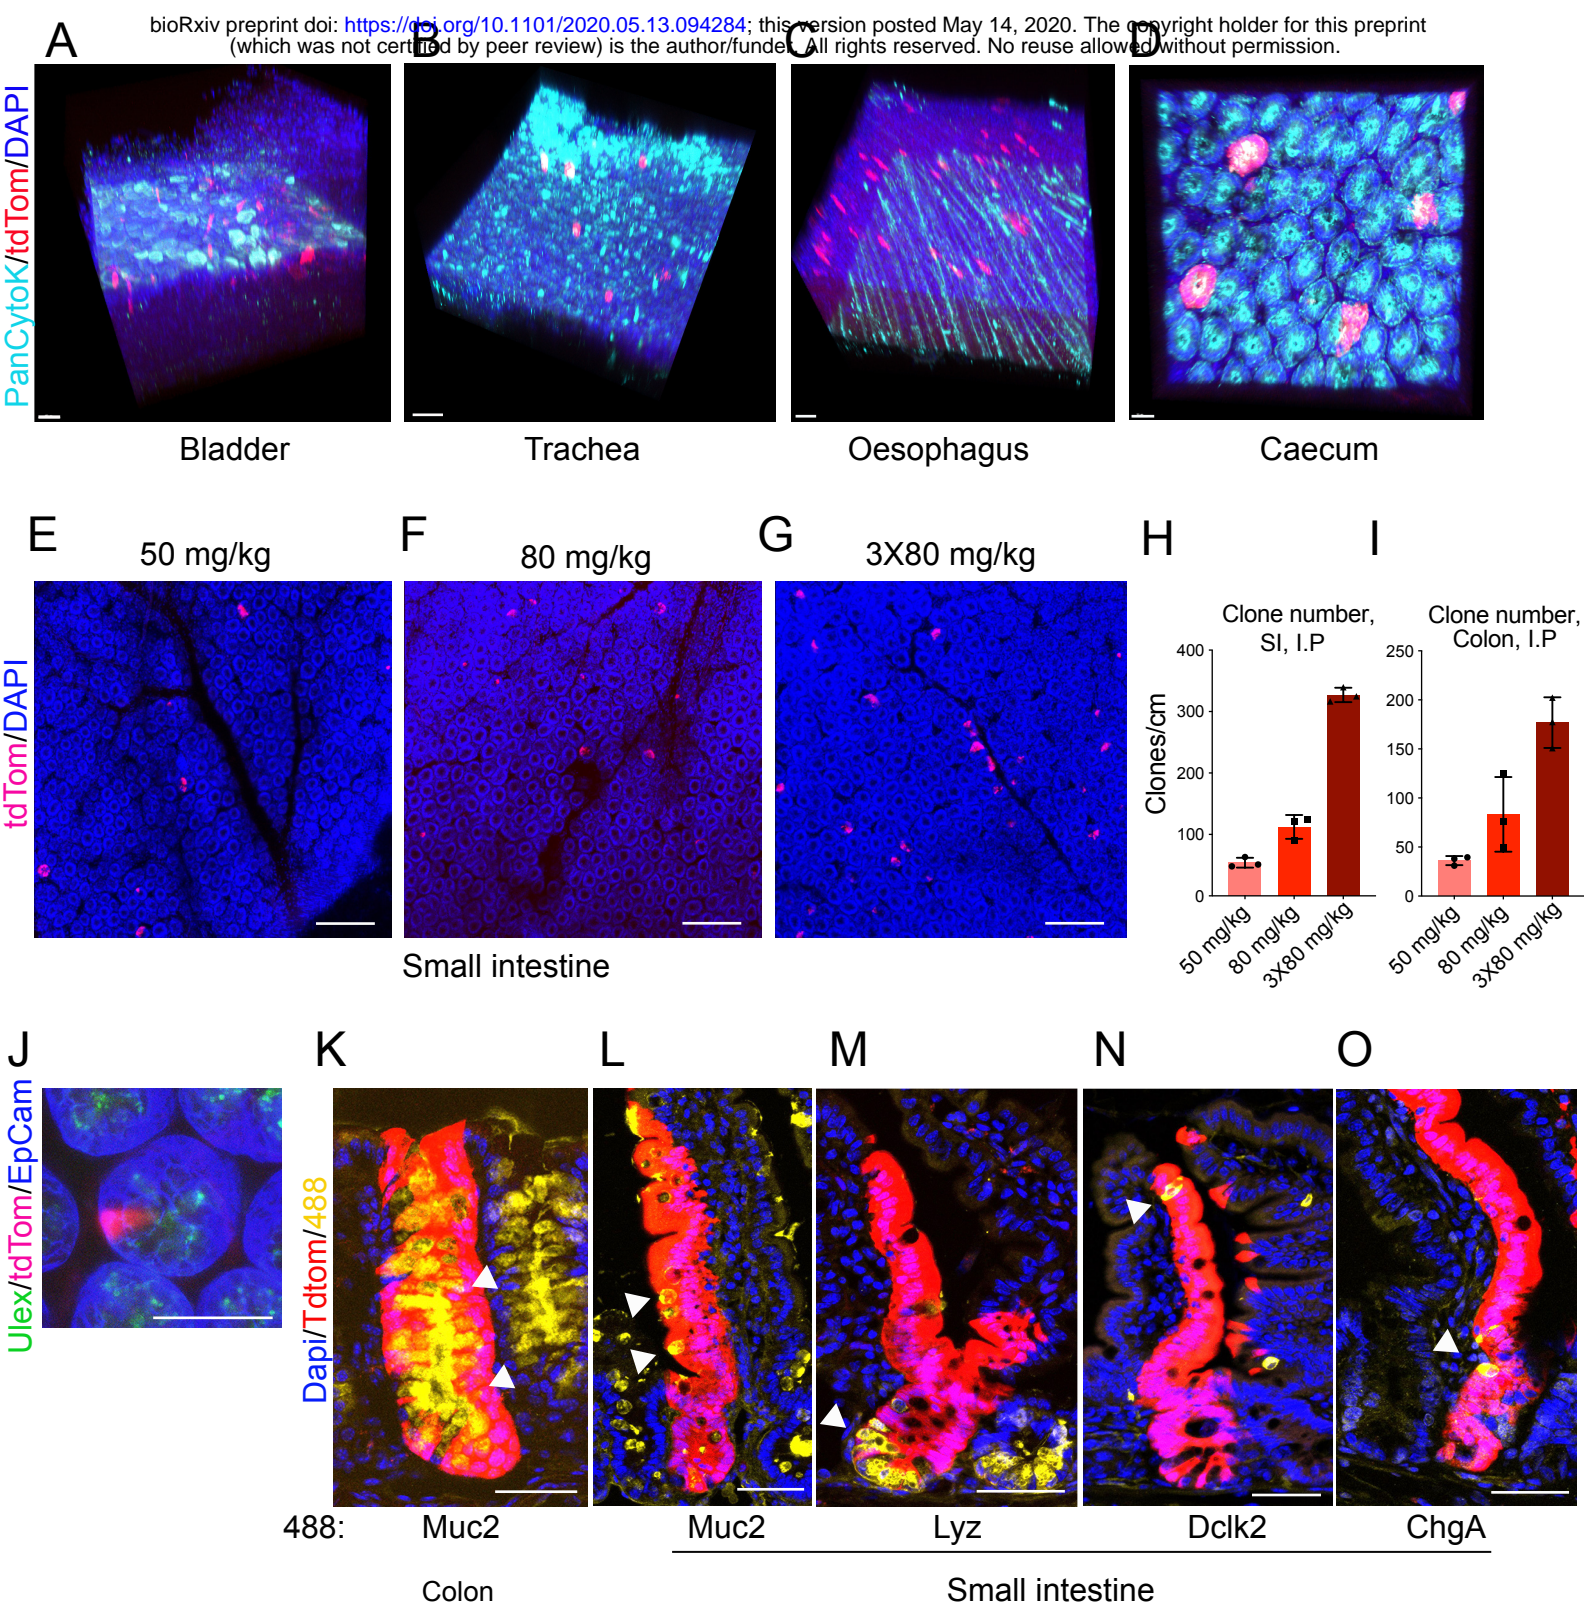

FIGURE 1

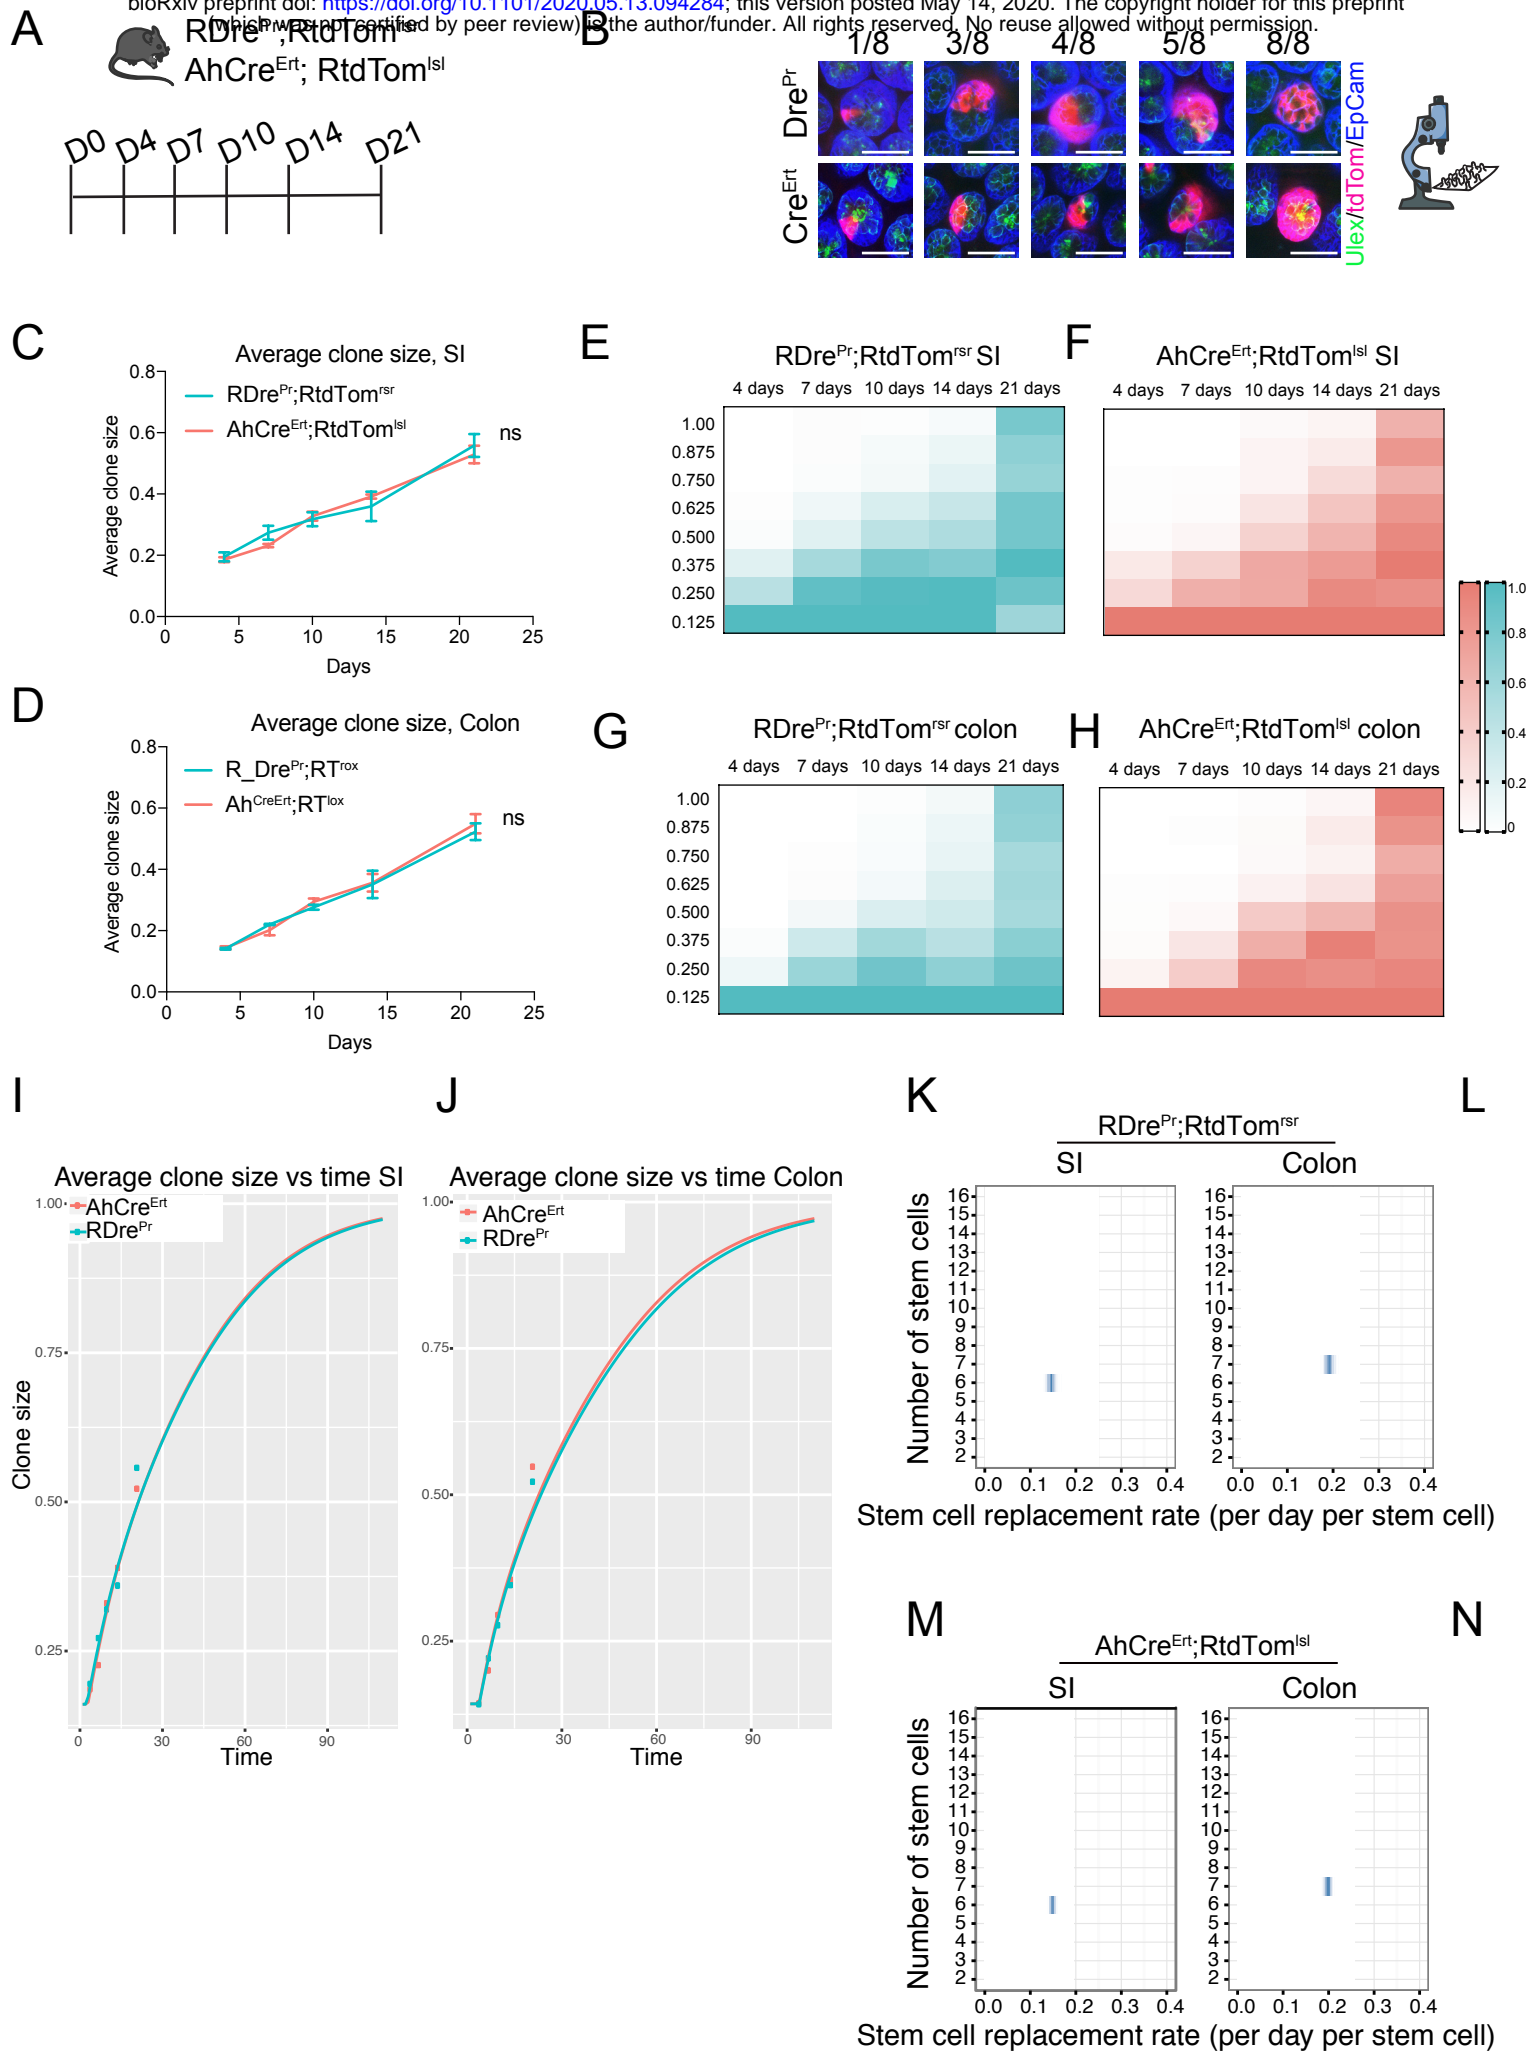

FIGURE 2



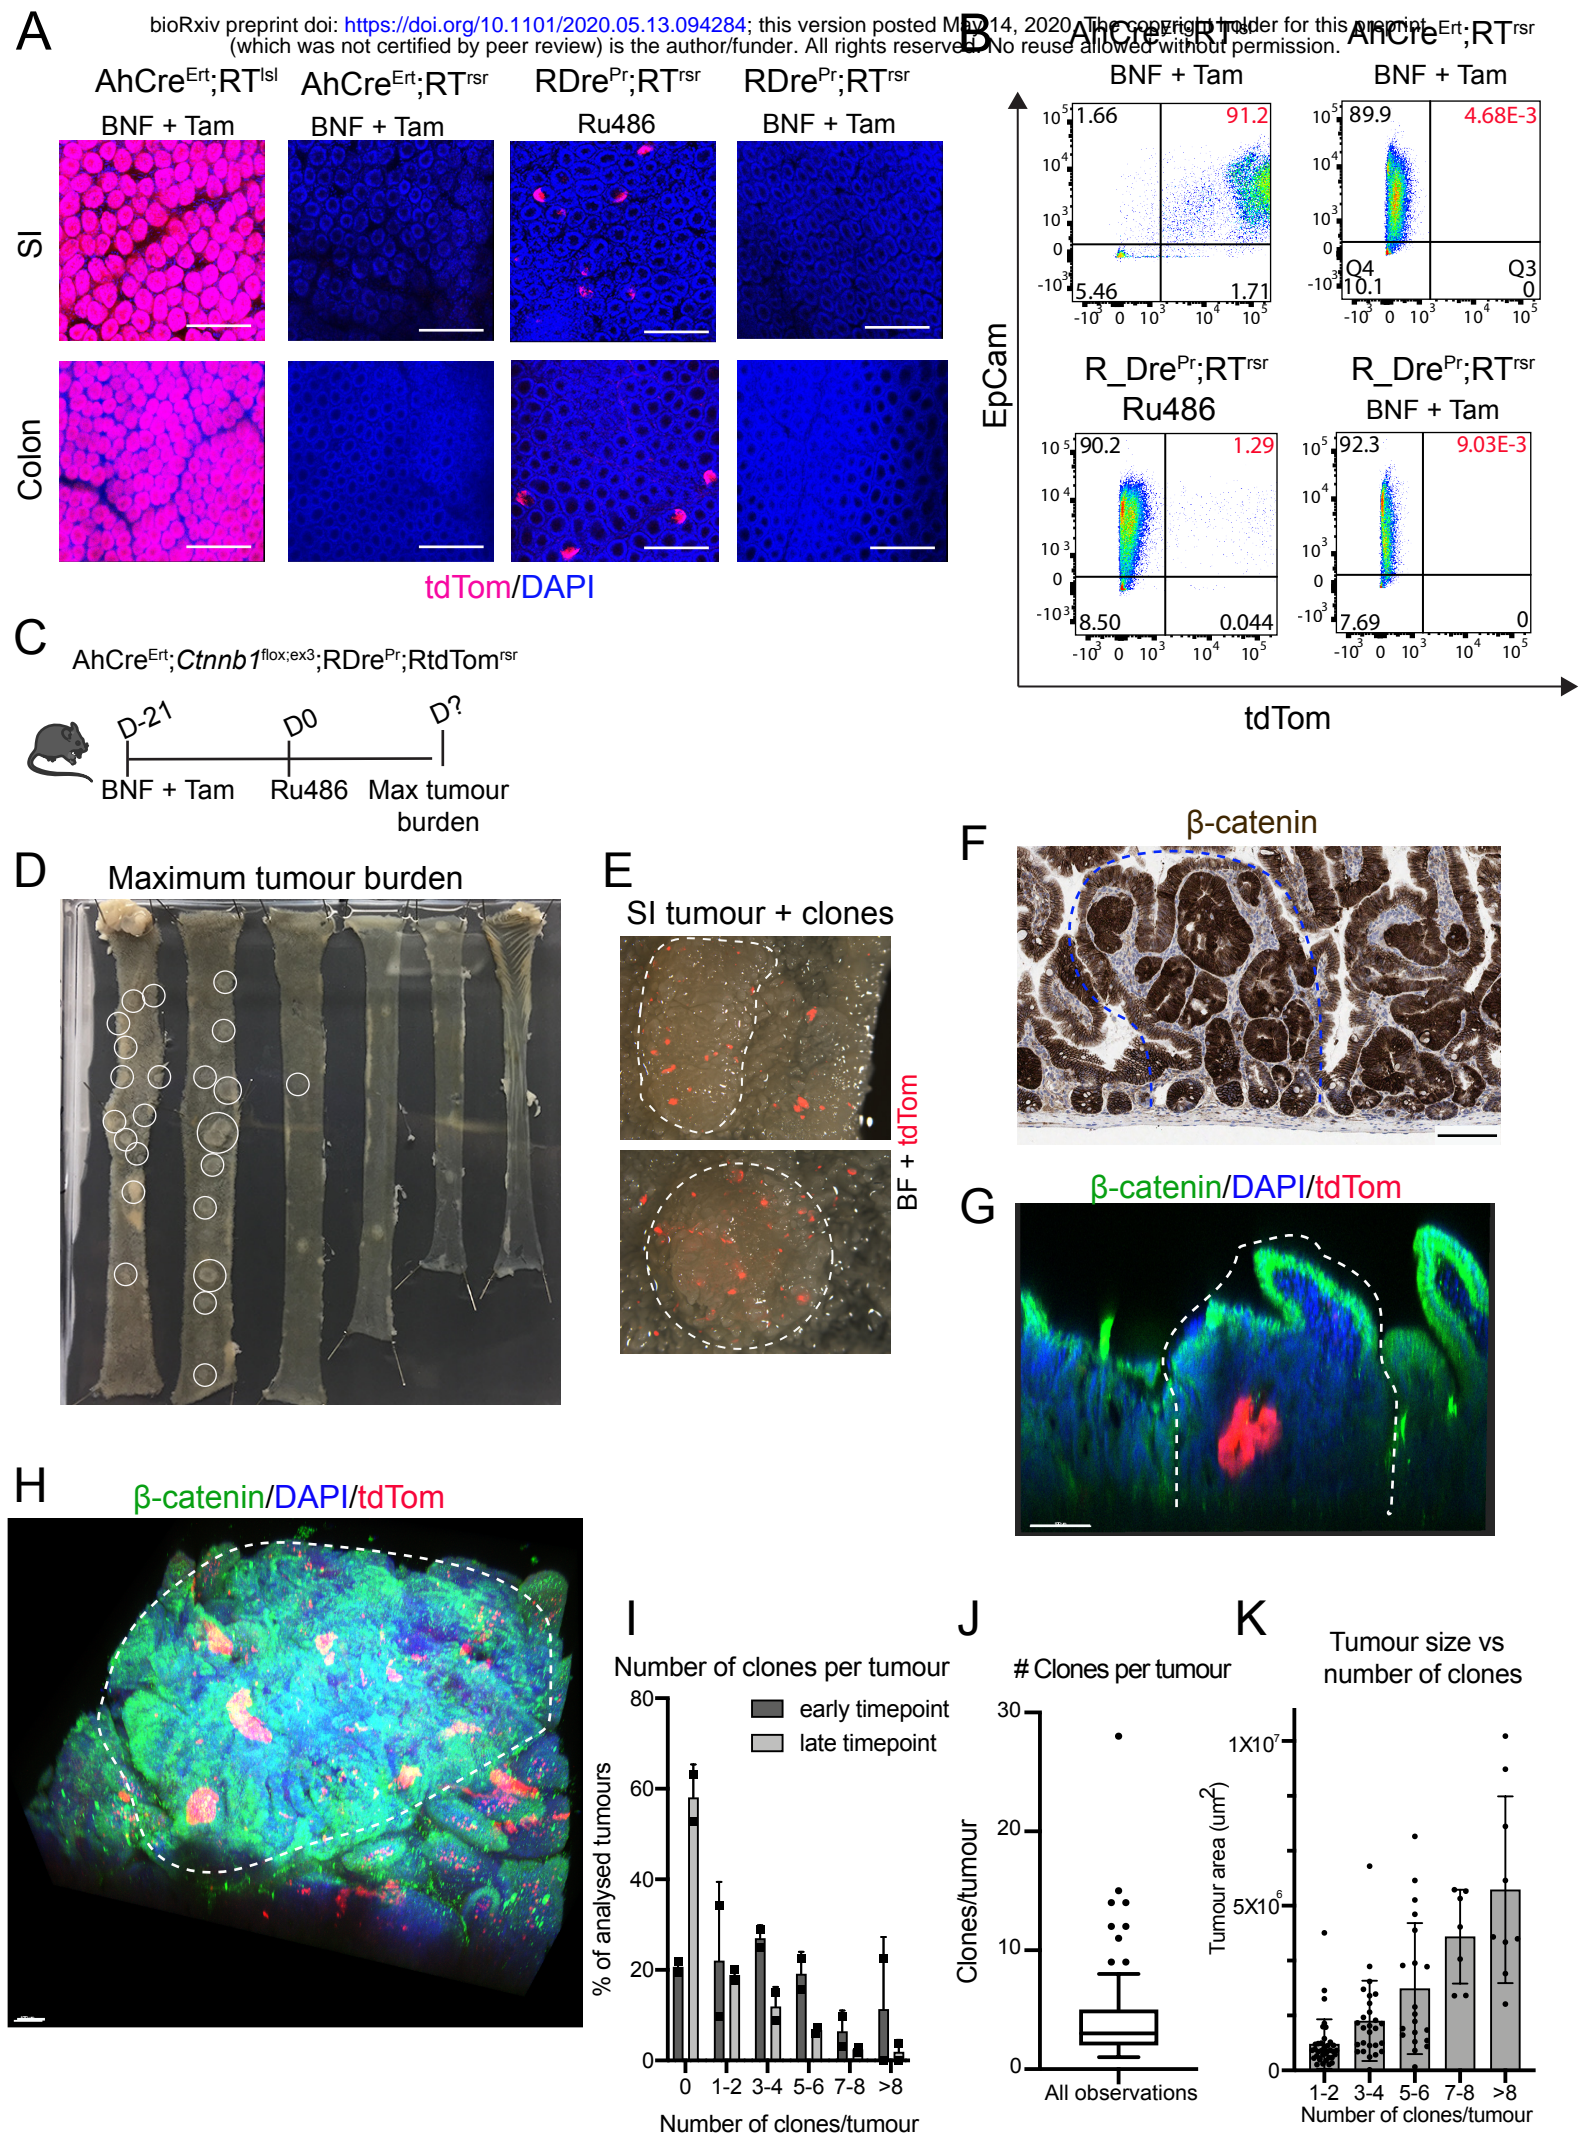

FIGURE 3

**A**

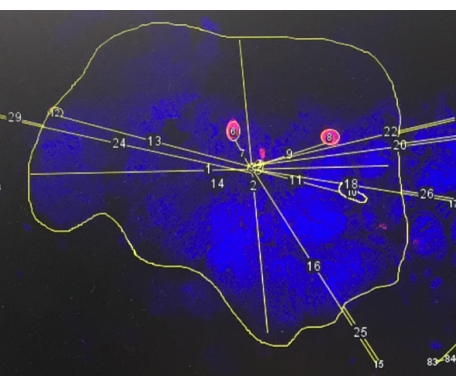

Non-tumour tissue

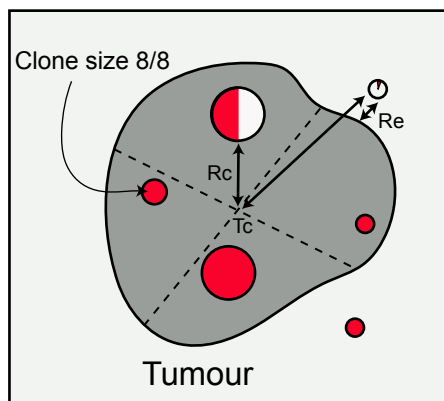

**B**

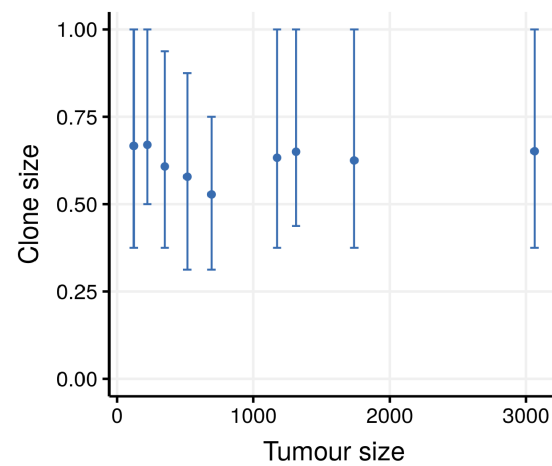

**C**

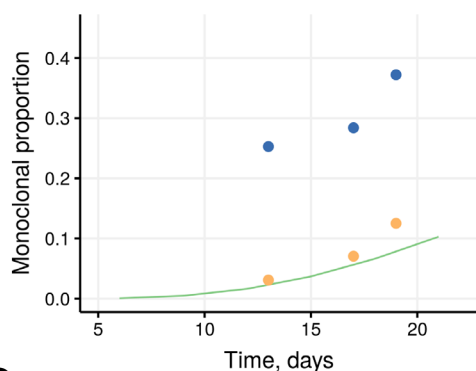

**D**

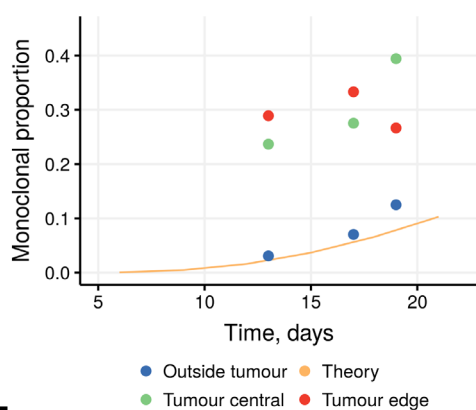

**E**

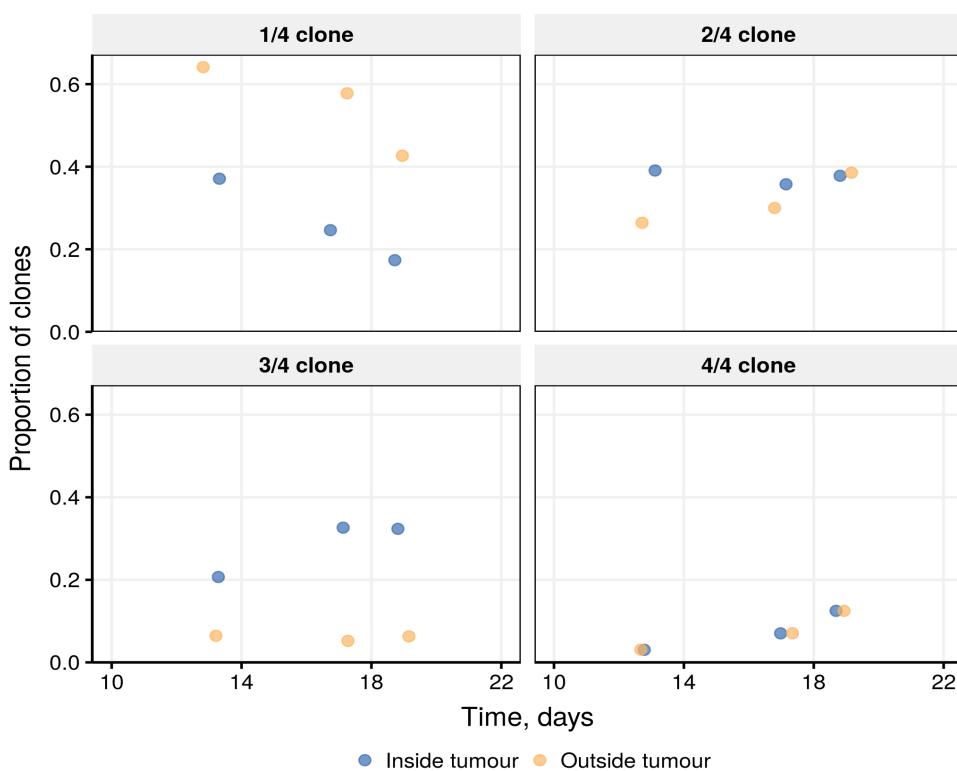

**F**

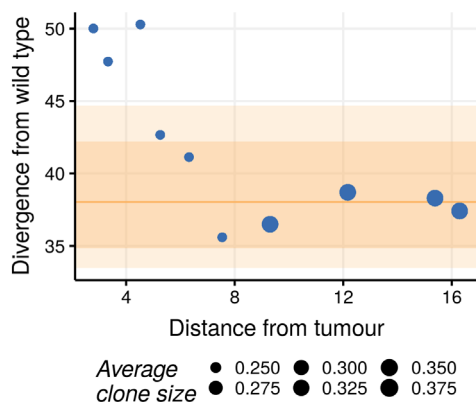

**G**

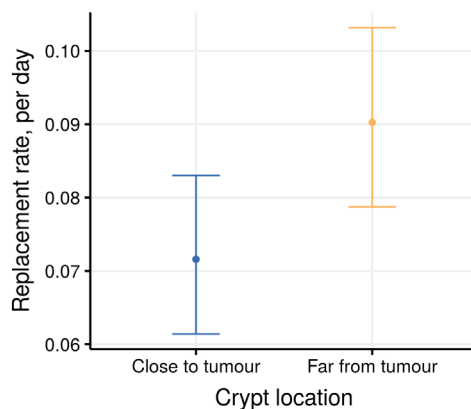

FIGURE 4
